# Supplementary material for: CRISPR‐TAPE: protein‐centric CRISPR guide design for targeted proteome engineering
Source: PubMed Central journal article supplement (PMC7266498; doi:10.15252/msb.20209475), 2020-06-02
Supplement: MSB-16-e9475-s006.pdf [file MSB-16-e9475-s006.pdf]

# CRISPR-TAPE: protein-centric CRISPR guide design for targeted proteome engineering

Daniel Anderson, Henry Benns, Edward Tate, and Matthew Child

DOI: [10.15252/msb.20209475](https://doi.org/10.15252/msb.20209475)

Corresponding author(s): *Matthew Child (m.child@imperial.ac.uk)*

---

## Review Timeline:

|                        |             |
|------------------------|-------------|
| First Submission Date: | 24th Jan 20 |
| Editorial Decision:    | 28th Jan 20 |
| Second submission:     | 11th Mar 20 |
| Editorial Decision:    | 14th Apr 20 |
| Revision Received:     | 26th Apr 20 |
| Editorial Decision:    | 30th Apr 20 |
| Revision Received:     | 30th Apr 20 |
| Accepted:              | 4th May 20  |

---

*Editor: Maria Polychronidou*

## Transaction Report:

(Note: With the exception of the correction of typographical or spelling errors that could be a source of ambiguity, letters and reports are not edited. Depending on transfer agreements, referee reports obtained elsewhere may or may not be included in this compilation. Referee reports are anonymous unless the Referee chooses to sign their reports.)

28th Jan 2020

Manuscript Number: MSB-20-9475

Thank you for submitting your manuscript titled "CRISPR-TAPE: a protein-centric CRISPR guide design tool for targeted proteome engineering" to Molecular Systems Biology.

I have now had the chance to read your manuscript and I regret to inform you that we that we have decided to not send it out for peer review.

In this study, you present CRISPR-TAPE, a protein-centric CRISPR guide RNA (gRNA) design algorithm for Targeted Proteome Engineering. We appreciate that you report that compared to gene-centric algorithms CRISPR-TAPE does not require post-hoc curation, simplifies gRNA outputs and reduces CPU times for gRNA identification. Given the focus of the manuscript on reporting a new methodology, we think that a Correspondence does not seem to be the most suitable format. It seems more appropriate to consider the study as a Method. While we acknowledge the speed and efficiency of the approach, we feel that in itself this improvement would not seem to provide the kind of decisive methodological advance that would be required for publication in Molecular Systems Biology. Even though we cannot offer to publish your manuscript in its current form, we recognize that CRISPR-TAPE could be a potentially relevant methodology. As such, we would not be opposed to considering editorially an extended manuscript, including a demonstration of the application(s) and advantages of CRISPR-TAPE for protein engineering e.g. for targeted protein modification or protein evolution.

I am very sorry to have to disappoint you on this occasion, but I hope that this early decision will allow you to decide how to proceed with your manuscript without undue delay.

Yours sincerely,

Maria Polychronidou, PhD  
Senior Editor  
Molecular Systems Biology

This revision was an invited resubmission and therefore contained no point by point response.

14th Apr 2020

Manuscript Number: MSB-20-9475R

Title: CRISPR-TAPE: protein-centric CRISPR guide design for targeted proteome engineering

Thank you again for submitting your work to Molecular Systems Biology. We have now heard back from the three referees who agreed to evaluate your study. Overall, the reviewers think that the presented protein-centric approach to gRNA design is potentially useful for future applications. They raise however a series of concerns, which we would ask you to address in a revision.

As you will see below, the issues raised by the reviewers are rather clear and I think that there is no need to repeat the points listed below. Both reviewers #1 and #2 point out that experimentally validating some of the predicted gRNAs would significantly enhance the conclusiveness and impact of the study. They do indicate however, that such experiments may be outside the scope of the work. As such, we think that experimental validations are not mandatory for the acceptance of the study. That said, we would not be opposed to the inclusion of such data in case you have it already at hand or are willing to produce it.

Reviewer #3, in their succinct report, raise issues regarding the novelty of the study and we would therefore ask you to better emphasize in the text the novelty and significance of the work.

On a more editorial level, we would ask you to address the following.

---

## **REFEREE REPORTS**

Reviewer #1:

In this paper, Anderson, Benns et al. developed a protein-centric approach to CRISPR gRNA design that they call CRISPR-TAPE. While currently available design software is gene-centric and optimized for gene disruption, this protein-centric approach will be very powerful, when specific point mutations, insertions or deletions have to be made to a protein site-specifically, which requires the gRNA to target a specific position within the coding sequence of the gene. I agree with the authors that this will be especially useful, when all amino acids of a certain type are to be mutated in order to identify attachment sites e.g. for posttranslational modifications. While I am not an expert for the design of such algorithms, I downloaded the software and was easily able to reproduce the

experiment that is given in the manuscript. I highly appreciate that the software is available in a stand-alone format and does not require additional tools. One thing that would be nice, would be to verify the performance of the designed gRNAs on a selected test case. Nevertheless, as I expect that these experiments cannot be done in a timely manner in the current situation, I would support publication without this verification experiment. I, therefore, think that this manuscript is suitable for publication in Molecular Systems Biology after a few minor comments have been addressed.

- I think it would be good for the non-expert reader, to add a little bit of information on the workflow, how gene-editing with CRISPR is done. This should include, why the CRISPR cleavage positions at certain distances to the site of interest are needed in certain cases and what the problems with gRNA design are. Also there might be a sentence to state that for gene disruption the position in the gene is less important and that is why traditional tools are designed in the way they are. In this way, there would be a clearer path to why the software was designed in the way that it is.

- During my evaluation of the software the first attempt that I started from the Desktop did not work. There might be some issue with the long pathname or I might have made a copy-paste mistake. In the second try from a different location it worked nicely. In the failed case, the software just did not give any response. I guess some kind of error messages, bug reports or at least prompts that there was an error would be good to add. Especially considering that the user is encouraged to send back error reports.

- Figure 2 and S2 are very hard to read in the current size and resolution. I think it would be easier and better for the user to also have them as Excel tables (especially Figure S2)

- At the last page of the SI, the Citation of this paper is given as "TBC". I understand the reasoning for use in the program, but would delete this from the manuscript.

Reviewer #2:

Summary: Anderson et al. describe CRISPR-TAPE as a new tool that enables the rapid identification of gRNAs proximal to specific sites in coding sequencing. This tool represents a useful mechanism for gRNA prioritization for example for CRISPR-based mutagenesis screens. The key innovation of this study is that it takes a protein-centric approach to gRNA design, and as a result is uniquely suited to the production of point mutations in coding sequences. Another key result of this study is that it speeds up the production of guides, reduces computing time, and decreases requirements for manual curation.

Recommendation: This study represents an exciting tool for gRNA design with applications to chemoproteomics and chemical biology. However, several points should be addressed prior to consideration for publication in MSB.

- 1) Could gRNAs for base editors be incorporated into the algorithm? Given the low efficiency of homology directed repair (HDR), the use of base editors would likely be a more efficient strategy to generate point mutations. If incorporation into the package is not possible, discussion of the limitations of HDR for producing point mutations should be included in the text.
- 2) The authors should more clearly highlight the rationale and importance behind why they chose to prioritize proximity to nuclease cut sites. What other features do existing programs prioritize? Is this a novel feature? Has it been implemented in other algorithms?
- 3) CPU run time was used to assess algorithm efficiency in comparison to manual curation.

However, this algorithm was only compared to two other gRNA generating algorithms, EuPaGDT and CHOPCHOP. The authors commented how the difference in "consortia-funded data servers" make algorithm comparisons unequal. Are there other "stand-alone" packages/software/programs that they could benchmark their package against to provide a fairer comparison of CPU run time? What about other benchmarks, such as memory/power consumption, latency between user input and program execution?

4) Modification of Fig 1 to show both CRISPR-TAPE and a traditional gene-centric workflows would make the manuscript more accessible.

5) While it may be beyond the scope of this text, the manuscript would be significantly strengthened with the addition of experimental validation of some identified guides.

6) Figure S2 is extremely small and hard to interpret and should be modified for clarity.

Reviewer #3:

The authors present a protein-centric gRNA search tool which enables fast gRNA search to target specific regions or amino acids within a protein. The authors claims that the tool might be helpful to modify specific amino acid such as a catalytic residue, which means base editing of the sequence. But currently there are Crispr editors independent of double-strand breaks and homology-directed repair, which reduce the imporantance of this manuscript. Thus, the manuscript did not provide significant appovement to the field.

We would like to thank you and all three reviewers for taking the time to carefully consider our work, and for their specific reviews. We have addressed all the points raised, and as a result feel that the manuscript has been further strengthened.

The following details our point-by-point response to the specific reviewer comments for Anderson & Benns *et al.* For clarity of our responses, we have kept reviewer comments in black text, our direct responses are in blue text, and text additions to the main manuscript can be identified as red text, both here and in the main manuscript where they have been inserted.

### **Reviewer #1:**

In this paper, Anderson, Benns et al. developed a protein-centric approach to CRISPR gRNA design that they call CRISPR-TAPE.

While currently available design software is gene-centric and optimized for gene disruption, this protein-centric approach will be very powerful, when specific point mutations, insertions or deletions have to be made to a protein site-specifically, which requires the gRNA to target a specific position within the coding sequence of the gene. I agree with the authors that this will be especially useful, when all amino acids of a certain type are to be mutated in order to identify attachment sites e.g. for posttranslational modifications. While I am not an expert for the design of such algorithms, I downloaded the software and was easily able to reproduce the experiment that is given in the manuscript. I highly appreciate that the software is available in a stand-alone format and does not require additional tools.

One thing that would be nice, would be to verify the performance of the designed gRNAs on a selected test case. Nevertheless, as I expect that these experiments cannot be done in a timely manner in the current situation, I would support publication without this verification experiment.

- We appreciate Review 1's understanding of the utility of the tool, as well as time issues in regard to validation of guides. We reiterate that while CRISPR-TAPE allows for the process of guide design to be initiated at the level of a protein target, the rules governing guide identification unchanged, and so guides are functionally equivalent to those generated by other tools (and present within standard guide outputs) but do not require subsequent extensive and time consuming manual curation to identify.

I, therefore, think that this manuscript is suitable for publication in Molecular Systems Biology after a few minor comments have been addressed.

- I think it would be good for the non-expert reader, to add a little bit of information on the workflow, how gene-editing with CRISPR is done. This should include, why the CRISPR cleavage positions at certain distances to the site of interest are needed in certain cases and what the problems with gRNA design are. Also there might be a sentence to state that for gene disruption the position in the gene is less important and that is why traditional tools are designed in the way they are. In this way, there would be a clearer path to why the software was designed in the way that it is.

- As the reviewer suggests, the following brief introduction to CRISPR has been added to **page 1, paragraph 1**:

*“CRISPR technologies depend on the targeting of an RNA-guided endonuclease to a defined sequence location within the genome. This system has been harnessed for a variety of genome modification strategies including gene knockouts (through incorrect repair of breaks), and site-directed mutagenesis (though increased efficiency of homology-directed repair incorporating DNA templates at genomic regions close to the breaks). In most applications accurate targeting of the nuclease to the genomic locus takes priority over the specific nucleotide position of enzymatic activity. While engineering of the nuclease has driven diversification of the technologies that this system can support (Pickar-Oliver & Gersbach, 2019), the molecular rules governing nuclease*

*targeting remain the same; the genome address is encoded within a guide RNA sequence (gRNA), defined as a 20-nucleotide stretch of genomic DNA preceding a protospacer-adjacent motif (PAM)."*

- And, we have expanded upon the text in the manuscript to provide additional detail and a clearer path towards the underlying rationale for the software design, with the following text added to added to **page 2, paragraph 2:**

*"This is important as the increased efficiency of homology-directed repair (HDR) at double-strand breaks driven by the activity of the nuclease has a limited range. The efficiency of HDR decreases with increasing distance from the nuclease cut site, up to a maximum range of 30 nt (Paquet et al, 2016). If the distance of the mutation site of interest from the nuclease cut site is greater than 30 nt, there is no increase in the efficiency of HDR afforded by the use of the RNA-guided nuclease. This emphasizes the need to account for this when selecting gRNAs for directed mutagenesis strategies, where optimal HDR is essential."*

- During my evaluation of the software the first attempt that I started from the Desktop did not work. There might be some issue with the long pathname or I might have made a copy-paste mistake. In the second try from a different location it worked nicely. In the failed case, the software just did not give any response. I guess some kind of error messages, bug reports or at least prompts that there was an error would be good to add. Especially considering that the user is encouraged to send back error reports.

- We appreciate the lack of an error box pop-up in certain use scenarios is not helpful to the user, and during the process of developing the tool we endeavoured to identify *all possible* error situations, but this is obviously a challenging task. We have added the following specific point to the troubleshooting section of the app-associated README, see **page 16, final bullet point of troubleshooting:**

*"It is possible that in certain unanticipated user situations error-pops might not appear, indicating a new error that has not been previously identified. Please report as requested for bugs (see below)."*

- We are continuing to write and deployed new versions of the script to ensure that once identified and reported, use error scenarios are recognized via a pop-up window. New versions have been deployed to ensure that in all situations of correct script launch but completion without guide generation, an error pop-up occurs.

- Figure 2 and S2 are very hard to read in the current size and resolution. I think it would be easier and better for the user to also have them as Excel tables (especially Figure S2)

- As requested, we have included higher resolution tables in Figure 2, and replaced Figure S2 with a Supplementary excel data table (now table EV1).

- At the last page of the SI, the Citation of this paper is given as "TBC". I understand the reasoning for use in the program, but would delete this from the manuscript.

- We apologise for this. The SI is a direct copy of the app-associated README, which has been live and available for community use since February alongside the tool. The citation will be retained within the downloadable README, but has been removed from the SI as requested.

### **Reviewer #2:**

Summary: Anderson et al. describe CRISPR-TAPE as a new tool to that enables the rapid identification of gRNAs proximal to specific sites in coding sequencing. This tool represents a useful mechanism for gRNA prioritization for example for CRISPR-based mutagenesis screens. The key innovation of this study is that it takes a protein-centric approach to gRNA design, and as a result is uniquely suited to the production of point



mutations in coding sequences. Another key result of this study is that it speeds up the production of guides, reduces computing time, and decreases requirements for manual curation.

Recommendation: This study represents an exciting tool for gRNA design with applications to chemoproteomics and chemical biology. However, several points should be addressed prior to consideration for publication in MSB.

1) Could gRNAs for base editors be incorporated into the algorithm? Given the low efficiency of homology directed repair (HDR), the use of base editors would likely be a more efficient strategy to generate point mutations. If incorporation into the package is not possible, discussion of the limitations of HDR for producing point mutations should be included in the text.

- We appreciate the reviewer's comments and consideration about the future potential of the tool in relation to other members of the growing CRISPR-Cas tool-box. Traditional base editors (e.g. Cas9-cytidine/adenine deaminase fusions) are still reliant upon gRNAs for their targeting to a region of interest. As such, users of these base-editing tools would be able to use CRISPR-TAPE in its current form, and not require special modifications to the script. While the base-editing functions of these systems are constantly improving, at best the enzymatic process of base editing is still somewhat imprecise and takes place optimally between positions 4-8 within the gRNA sequence 5' of the PAM. Furthermore, the specific activity of the current base editors enable C-to-T or A-to-G base editing. As such, some amino acids switches remain inaccessible, e.g. threonine-serine (to name but one of many). HDR remains a useful strategy for tailored protein mutagenesis strategies. For that reason we have initially focused the tool on supporting HDR-driven mutagenesis strategies, which are more precise. For future versions of CRISPR-TAPE it will be interesting to see if we can include a strategy to encode and incorporate a base editing search function. We are similarly considering how to adapt the script to support Prime-editing strategies. While these updates would certainly increase the future utility of the tool, we have not yet established appropriate algorithms to enable them. To support researchers seeking to do this more rapidly than we are currently able, we have already made the CRISPR-TAPE base code freely available via Github (referenced in the main body text), and ensured that our source code has been written to support the modular integration of script expansions in the future.
- We have recognized this specific use case identified by the reviewer, and included the following text re. base editors on **page 4, paragraph 2**:

*“This would support CRISPR base editing using Cas9-cytidine/adenine deaminase fusions where particular amino acids switches are enzymatically inaccessible, such as threonine to serine. CRISPR-TAPE is focused on protein-led gRNA design, with guide outputs being for suitable for all CRISPR systems (e.g. base editors (Rees & Liu, 2018)).”*

- And also on **page 5, paragraph 2**:

*“The code can also be expanded to include amino acid motif-based proteome engineering strategies, batch processing, and next generation genome editing tools such as Prime Editing (Anzalone et al, 2019).”*

2) The authors should more clearly highlight the rationale and importance behind why they chose to prioritize proximity to nuclease cut sites.

- A similar point was raised by reviewer 1, and in line with our response to that point the following text has been added to **page 2, paragraph 2**:

*“This is important as the increased efficiency of homology-directed repair (HDR) at double-strand breaks driven by the activity of the nuclease has a limited range. The efficiency of HDR decreases with increasing distance from the nuclease cut site, up to a maximum range of 30 nt (Paquet et al, 2016). If the distance of the mutation site of interest from the nuclease cut site is greater than 30 nt, there is no increase in the efficiency of HDR*

*afforded by the use of the RNA-guided nuclease. This emphasizes the need to account for this when selecting gRNAs for directed mutagenesis strategies, where optimal HDR is essential.”*

What other features do existing programs prioritize? Is this a novel feature? Has it been implemented in other algorithms?

- The features of other programs are program-dependent and typically prioritize disruption of the gene. This identification of gRNAs that direct nucleases close to a particular residue or amino acid type is a novel feature unique to CRISPR-TAPE that has not been implemented for other algorithms. We have included the following statement to make this clearer in the text on **page 2, paragraph 3**:

*“To our knowledge, these features are unique to CRISPR-TAPE.”*

3) CPU run time was used to assess algorithm efficiency in comparison to manual curation. However, this algorithm was only compared to two other gRNA generating algorithms, EuPaGDT and CHOPCHOP. The authors commented how the difference in "consortia-funded data servers" make algorithm comparisons unequal. Are there other "stand-alone" packages/software/programs that they could benchmark their package against to provide a fairer comparison of CPU run time? What about other benchmarks, such as memory/power consumption, latency between user input and program execution?

- Regarding overall timesaving, we envisage that the primary advantage of the protein focus removal of the need for manual curation, and that while the reduced processing was apparent and notable, it is secondary to the time saving in relation to the removal of need for manual curation of gRNAs. As the reviewer rightly points out, many factors can feed in to this, but the case for manual curation is clearer – i.e. when applied for protein engineering, manual curation is required for traditional gRNA outputs, but not necessary for CRISPR-TAPE outputs.
- We intentionally only provided limited comparison to existing tools as after much deliberation we felt that benchmarking for different tools is challenging and inherently unfair, for example, which ones would we compare of the >20 gRNA search tools available? As the scripts underlying the many different tools are fundamentally different in terms of their computational approach, and as CRISPR-TAPE provides a search mechanism not accessible and therefore not directly comparable to other algorithms, we have not heavily focused on comparing the efficiency of our script in relation to others. Fundamentally, the improvement in search speed is a reflection of the restricted search space that results from targeting specific amino acids or amino acid types, and not the entire gene locus. We attempted to undertake what we considered to be the “fairest” comparison possible – we performed gRNA searches for an entire locus using our script (e.g. not selecting an amino acid or amino acid type, and instead deploying our script in a more “traditional” mode). We consider this to be the fairest comparison as the underlying scripts and computational transformations for both searches are then identical, with the only difference being the protein-focused element (which is the focus of the CRISPR-TAPE).
- We have also taken into consideration the points raised by the reviewer, and expanded the statement regarding consortia-funded servers on **page 4, paragraph 2**:

*“This difference could be due to a number of factors including the processing power of the consortia-funded data servers that support these community tools. Moreover, user dependent factors such as memory/power consumption, and latency times between user input and program execution makes direct comparison of processing speeds for different algorithms inherently unequal. Fundamentally, the improvement in computation processing speed is a reflection of the restricted search space that results from targeting specific amino acids or amino acid types, and not the entire gene locus.”*

4) Modification of Fig 1 to show both CRISPR-TAPE and a traditional gene-centric workflows would make the manuscript more accessible.

- As suggested, we have updated figure 1 to include the gene-centric approach alongside the CRISPR-TAPE workflow. To accommodate this change we have shifted Figure 1b. (the lower resolution screen shot of the custom GUI) to the supplementary information.
- 5) While it may be beyond the scope of this text, the manuscript would be significantly strengthened with the addition of experimental validation of some identified guides.
- We are currently unable to undertake these experiments, but would like to stress that while CRISPR-TAPE allows for the process of guide design to be initiated at the level of a protein target, the rules governing guide identification and behaviour are fundamentally unchanged, and so the basic functionality of CRISPR-TAPE-generated guides are directly equivalent to those generated by other tools (and present within standard guide outputs) but do not require subsequent extensive and time consuming manual curation.
- 6) Figure S2 is extremely small and hard to interpret and should be modified for clarity.
- As requested, to improve clarity this has been replaced by a supplementary excel data table EV1.

**Reviewer #3:**

The authors present a protein-centric gRNA search tool which enables fast gRNA search to target specific regions or amino acids within a protein. The authors claims that the tool might be helpful to modify specific amino acid such as a catalytic residue, which means base editing of the sequence.

But currently there are Crispr editors independent of double-strand breaks and homology-directed repair, which reduce the imporantance of this manuscript.

Thus, the manuscript did not provide significant appovement to the field.

- We appreciate the reviewer's careful consideration of the manuscript, and consideration of the relevance of CRISPR-TAPE in relation to existing gRNA design tools. While tools for gRNA design are widely available, to our knowledge no existing tools allows for gRNA design to be undertaken from the level of the protein coding sequence. i.e. to make experimental design decisions (e.g. amino acids or amino acid types to target), and have protein-focused gRNAs provided in relation to the nucleotide position of the nuclease cut site from targeted protein feature of interest. Taking into the consideration the novelty of this aspect of our algorithm, we feel that our tool will be valuable for the field, and provide substantial time saving in relation to the normal manual curation required to filter and identify gRNAs outputted from traditional tools that target a particular amino acid of interest within the protein, and do not simply direct the CRISPR-associated nuclease to a non-specified region of the locus in order to introduce double strand breaks and the possibility of incorrect repair leading to a gene knockout. As described in our response to reviewers 1 and 2, we have more strongly stressed the novelty of the tool.
- In relation to other members of the growing CRISPR-Cas toolbox and repeating an earlier response, traditional base editors (e.g. Cas9-cytidine/adenine deaminase fusions) are still reliant upon gRNAs for their targeting to a region of interest. As such, users of these base-editing tools would be able to use CRISPR-TAPE in its current form, and not require special modifications to the script. While the base-editing functions of these systems are constantly improving, at best the enzymatic process of base editing is still somewhat imprecise and takes place optimally between positions 4-8 within the gRNA sequence 5' of the PAM. Furthermore, the specific activity of the current base editors are restricted to C-to-T or A-to-G base editing. As such, some amino acids switches remain inaccessible, e.g. threonine-serine (to name but one of many). HDR remains a useful strategy for tailored protein mutagenesis strategies. For that reason we have initially focused the tool on supporting HDR-driven mutagenesis strategies, which are more precise. For future versions of CRISPR-TAPE it will be interesting to see if we can include a strategy to encode and

incorporate a base editing search function. We are similarly considering how to adapt the script to support Prime-editing strategies. While these updates would certainly increase the future utility of the tool, we have not yet established appropriate algorithms to enable them. To support researchers seeking to do this more rapidly, we have already made the CRISPR-TAPE base code freely available via Github (referenced in the main body text), and ensured that our base code has been written to support the modular integration of script expansions in the future. This means that the underlying algorithm has the potential to support uses tangential to the original guide search function outlined in this manuscript.

**Thank you for sending us your revised manuscript. We think that the performed revisions have satisfactorily addressed the issues raised by the reviewers. As such, I am glad to inform you that your manuscript is now suitable for publication, pending some minor editorial issues listed below.**

**We would ask you to address the following in a minor revision.**

**The Authors have made the requested editorial changes.**

4th May 2020

Manuscript number: MSB-20-9475RRR

Title: CRISPR-TAPE: protein-centric CRISPR guide design for targeted proteome engineering

Thank you again for sending us your revised manuscript. We are now satisfied with the modifications made and I am pleased to inform you that your paper has been accepted for publication.

**YOU MUST COMPLETE ALL CELLS WITH A PINK BACKGROUND** ↓

PLEASE NOTE THAT THIS CHECKLIST WILL BE PUBLISHED ALONGSIDE YOUR PAPER

Corresponding Author Name: Matthew Child

Journal Submitted to: Molecular Systems Biology

Manuscript Number: MSB-20-9475R

### Reporting Checklist For Life Sciences Articles (Rev. June 2017)

This checklist is used to ensure good reporting standards and to improve the reproducibility of published results. These guidelines are consistent with the Principles and Guidelines for Reporting Preclinical Research issued by the NIH in 2014. Please follow the journal's authorship guidelines in preparing your manuscript.

#### A- Figures

##### 1. Data

The data shown in figures should satisfy the following conditions:

- the data were obtained and processed according to the field's best practice and are presented to reflect the results of the experiments in an accurate and unbiased manner.
- figure panels include only data points, measurements or observations that can be compared to each other in a scientifically meaningful way.
- graphs include clearly labeled error bars for independent experiments and sample sizes. Unless justified, error bars should not be shown for technical replicates.
- if  $n < 5$ , the individual data points from each experiment should be plotted and any statistical test employed should be justified.
- Source Data should be included to report the data underlying graphs. Please follow the guidelines set out in the author ship guidelines on Data Presentation.

##### 2. Captions

Each figure caption should contain the following information, for each panel where they are relevant:

- a specification of the experimental system investigated (eg cell line, species name).
- the assay(s) and method(s) used to carry out the reported observations and measurements
- an explicit mention of the biological and chemical entity(ies) that are being measured.
- an explicit mention of the biological and chemical entity(ies) that are altered/varied/perturbed in a controlled manner.
- the exact sample size (n) for each experimental group/condition, given as a number, not a range;
- a description of the sample collection allowing the reader to understand whether the samples represent technical or biological replicates (including how many animals, litters, cultures, etc.).
- a statement of how many times the experiment shown was independently replicated in the laboratory.
- definitions of statistical methods and measures:
  - common tests, such as t-test (please specify whether paired vs. unpaired), simple  $\chi^2$  tests, Wilcoxon and Mann-Whitney tests, can be unambiguously identified by name only, but more complex techniques should be described in the methods section;
  - are tests one-sided or two-sided?
  - are there adjustments for multiple comparisons?
  - exact statistical test results, e.g., P values = x but not P values < x;
  - definition of 'center values' as median or average;
  - definition of error bars as s.d. or s.e.m.

Any descriptions too long for the figure legend should be included in the methods section and/or with the source data.

In the pink boxes below, please ensure that the answers to the following questions are reported in the manuscript itself. Every question should be answered. If the question is not relevant to your research, please write NA (non applicable). We encourage you to include a specific subsection in the methods section for statistics, reagents, animal models and human subjects.

#### B- Statistics and general methods

Please fill out these boxes ↓ (Do not worry if you cannot see all your text once you press return)

|                                                                                                                                                                                         |                         |
|-----------------------------------------------------------------------------------------------------------------------------------------------------------------------------------------|-------------------------|
| 1.a. How was the sample size chosen to ensure adequate power to detect a pre-specified effect size?                                                                                     | NA                      |
| 1.b. For animal studies, include a statement about sample size estimate even if no statistical methods were used.                                                                       | NA                      |
| 2. Describe inclusion/exclusion criteria if samples or animals were excluded from the analysis. Were the criteria pre-established?                                                      | NA                      |
| 3. Were any steps taken to minimize the effects of subjective bias when allocating animals/samples to treatment (e.g. randomization procedure)? If yes, please describe.                | NA                      |
| For animal studies, include a statement about randomization even if no randomization was used.                                                                                          | NA                      |
| 4.a. Were any steps taken to minimize the effects of subjective bias during group allocation or/and when assessing results (e.g. blinding of the investigator)? If yes please describe. | NA                      |
| 4.b. For animal studies, include a statement about blinding even if no blinding was done                                                                                                | NA                      |
| 5. For every figure, are statistical tests justified as appropriate?                                                                                                                    | Yes                     |
| Do the data meet the assumptions of the tests (e.g., normal distribution)? Describe any methods used to assess it.                                                                      | NA                      |
| Is there an estimate of variation within each group of data?                                                                                                                            | Yes, where appropriate. |

#### USEFUL LINKS FOR COMPLETING THIS FORM

<http://www.antibodypedia.com>  
<http://1degreebio.org>  
<http://www.equator-network.org/reporting-guidelines/improving-bioscience-research-repor>  
  
<http://grants.nih.gov/grants/olaw/olaw.htm>  
<http://www.mrc.ac.uk/Ourresearch/Ethicsresearchguidance/Useofanimals/index.htm>  
<http://ClinicalTrials.gov>  
<http://www.consort-statement.org>  
<http://www.consort-statement.org/checklists/view/32-consort/66-title>  
  
<http://www.equator-network.org/reporting-guidelines/reporting-recommendations-for-tum>  
  
<http://datadryad.org>  
  
<http://figshare.com>  
  
<http://www.ncbi.nlm.nih.gov/gap>  
  
<http://www.ebi.ac.uk/ega>  
  
<http://biomodels.net/>  
  
<http://biomodels.net/miriam/>  
<http://jij.biochem.sun.ac.za>  
[http://oba.od.nih.gov/biosecurity/biosecurity\\_documents.html](http://oba.od.nih.gov/biosecurity/biosecurity_documents.html)  
<http://www.selectagents.gov/>

|                                                                                   |    |
|-----------------------------------------------------------------------------------|----|
| Is the variance similar between the groups that are being statistically compared? | NA |
|-----------------------------------------------------------------------------------|----|

### C- Reagents

|                                                                                                                                                                                                                                                                                                                                                                  |    |
|------------------------------------------------------------------------------------------------------------------------------------------------------------------------------------------------------------------------------------------------------------------------------------------------------------------------------------------------------------------|----|
| 6. To show that antibodies were profiled for use in the system under study (assay and species), provide a citation, catalog number and/or clone number, supplementary information or reference to an antibody validation profile. e.g., Antibodypedia ( <a href="#">see link list at top right</a> ), 1DegreeBio ( <a href="#">see link list at top right</a> ). | NA |
| 7. Identify the source of cell lines and report if they were recently authenticated (e.g., by STR profiling) and tested for mycoplasma contamination.                                                                                                                                                                                                            | NA |

\* for all hyperlinks, please see the table at the top right of the document

### D- Animal Models

|                                                                                                                                                                                                                                                                                                                                                                                                                                          |    |
|------------------------------------------------------------------------------------------------------------------------------------------------------------------------------------------------------------------------------------------------------------------------------------------------------------------------------------------------------------------------------------------------------------------------------------------|----|
| 8. Report species, strain, gender, age of animals and genetic modification status where applicable. Please detail housing and husbandry conditions and the source of animals.                                                                                                                                                                                                                                                            | NA |
| 9. For experiments involving live vertebrates, include a statement of compliance with ethical regulations and identify the committee(s) approving the experiments.                                                                                                                                                                                                                                                                       | NA |
| 10. We recommend consulting the ARRIVE guidelines ( <a href="#">see link list at top right</a> ) (PLoS Biol. 8(6), e1000412, 2010) to ensure that other relevant aspects of animal studies are adequately reported. See author guidelines, under 'Reporting Guidelines'. See also: NIH ( <a href="#">see link list at top right</a> ) and MRC ( <a href="#">see link list at top right</a> ) recommendations. Please confirm compliance. | NA |

### E- Human Subjects

|                                                                                                                                                                                                                                                                                                                                                        |    |
|--------------------------------------------------------------------------------------------------------------------------------------------------------------------------------------------------------------------------------------------------------------------------------------------------------------------------------------------------------|----|
| 11. Identify the committee(s) approving the study protocol.                                                                                                                                                                                                                                                                                            | NA |
| 12. Include a statement confirming that informed consent was obtained from all subjects and that the experiments conformed to the principles set out in the WMA Declaration of Helsinki and the Department of Health and Human Services Belmont Report.                                                                                                | NA |
| 13. For publication of patient photos, include a statement confirming that consent to publish was obtained.                                                                                                                                                                                                                                            | NA |
| 14. Report any restrictions on the availability (and/or on the use) of human data or samples.                                                                                                                                                                                                                                                          | NA |
| 15. Report the clinical trial registration number (at ClinicalTrials.gov or equivalent), where applicable.                                                                                                                                                                                                                                             | NA |
| 16. For phase II and III randomized controlled trials, please refer to the CONSORT flow diagram ( <a href="#">see link list at top right</a> ) and submit the CONSORT checklist ( <a href="#">see link list at top right</a> ) with your submission. See author guidelines, under 'Reporting Guidelines'. Please confirm you have submitted this list. | NA |
| 17. For tumor marker prognostic studies, we recommend that you follow the REMARK reporting guidelines ( <a href="#">see link list at top right</a> ). See author guidelines, under 'Reporting Guidelines'. Please confirm you have followed these guidelines.                                                                                          | NA |

### F- Data Accessibility

|                                                                                                                                                                                                                                                                                                                                                                                                                                                                                                                                                                                                                                                                                                                                                        |                                                                 |
|--------------------------------------------------------------------------------------------------------------------------------------------------------------------------------------------------------------------------------------------------------------------------------------------------------------------------------------------------------------------------------------------------------------------------------------------------------------------------------------------------------------------------------------------------------------------------------------------------------------------------------------------------------------------------------------------------------------------------------------------------------|-----------------------------------------------------------------|
| 18. Provide a "Data Availability" section at the end of the Materials & Methods, listing the accession codes for data generated in this study and deposited in a public database (e.g. RNA-Seq data: Gene Expression Omnibus GSE39462, Proteomics data: PRIDE PXD000208 etc.) Please refer to our author guidelines for 'Data Deposition'.<br><br>Data deposition in a public repository is mandatory for:<br>a. Protein, DNA and RNA sequences<br>b. Macromolecular structures<br>c. Crystallographic data for small molecules<br>d. Functional genomics data<br>e. Proteomics and molecular interactions                                                                                                                                             | This has been provided for the CRISPR-TAPE deposition in Github |
| 19. Deposition is strongly recommended for any datasets that are central and integral to the study; please consider the journal's data policy. If no structured public repository exists for a given data type, we encourage the provision of datasets in the manuscript as a Supplementary Document (see author guidelines under 'Expanded View' or in unstructured repositories such as Dryad ( <a href="#">see link list at top right</a> ) or Figshare ( <a href="#">see link list at top right</a> ).                                                                                                                                                                                                                                             | NA                                                              |
| 20. Access to human clinical and genomic datasets should be provided with as few restrictions as possible while respecting ethical obligations to the patients and relevant medical and legal issues. If practically possible and compatible with the individual consent agreement used in the study, such data should be deposited in one of the major public access-controlled repositories such as dbGAP ( <a href="#">see link list at top right</a> ) or EGA ( <a href="#">see link list at top right</a> ).                                                                                                                                                                                                                                      | NA                                                              |
| 21. Computational models that are central and integral to a study should be shared without restrictions and provided in a machine-readable form. The relevant accession numbers or links should be provided. When possible, standardized format (SBML, CellML) should be used instead of scripts (e.g. MATLAB). Authors are strongly encouraged to follow the MIRIAM guidelines ( <a href="#">see link list at top right</a> ) and deposit their model in a public database such as Biomedels ( <a href="#">see link list at top right</a> ) or JWS Online ( <a href="#">see link list at top right</a> ). If computer source code is provided with the paper, it should be deposited in a public repository or included in supplementary information. | NA                                                              |

### G- Dual use research of concern

|                                                                                                                                                                                                                                                                                                                                   |    |
|-----------------------------------------------------------------------------------------------------------------------------------------------------------------------------------------------------------------------------------------------------------------------------------------------------------------------------------|----|
| 22. Could your study fall under dual use research restrictions? Please check biosecurity documents ( <a href="#">see link list at top right</a> ) and list of select agents and toxins (APHIS/CDC) ( <a href="#">see link list at top right</a> ). According to our biosecurity guidelines, provide a statement only if it could. | NA |
|-----------------------------------------------------------------------------------------------------------------------------------------------------------------------------------------------------------------------------------------------------------------------------------------------------------------------------------|----|
